# Supplementary material
Source: PubMed Central journal article supplement (PMC2672193)
Supplement: NIHMS72050-supplement-supplementary.pdf [file NIHMS72050-supplement-supplementary.pdf]

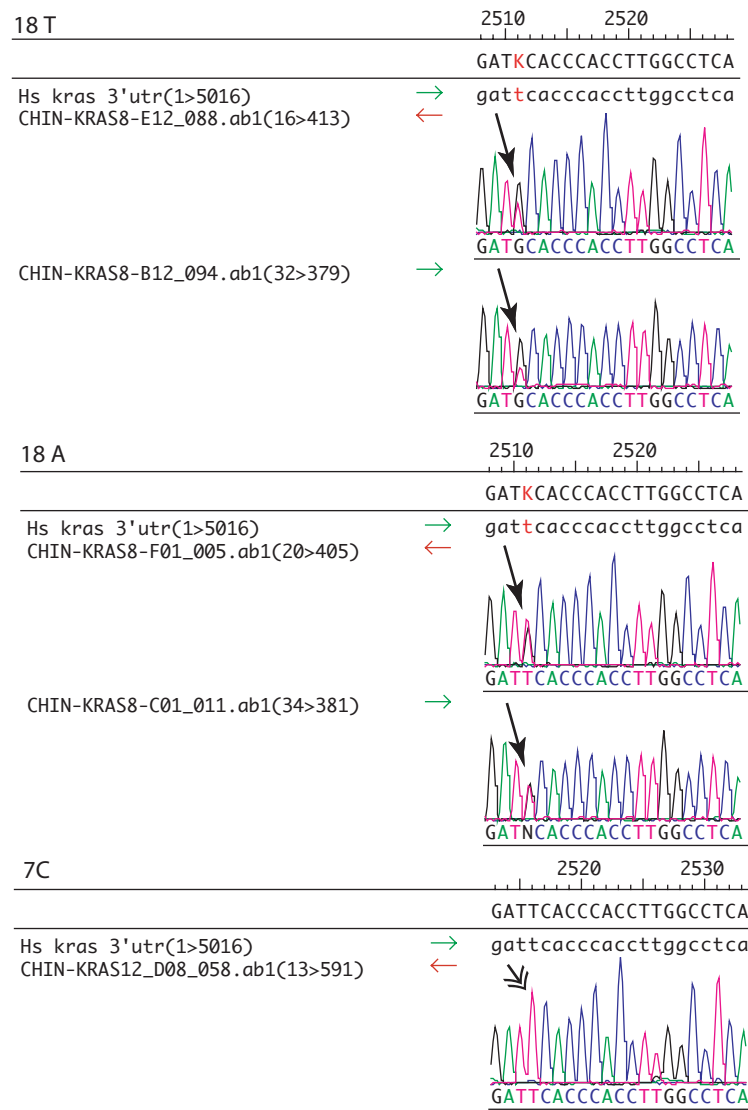

**Supplementary Figure 1:**

Representative sequencing traces from a tumor (T) and adjacent, non-cancerous (A) sample from a patient with the variant allele (18T and A) and a patient without the variant allele (7C). Solid arrows point to heterozygosity (T/G) at the fourth nucleotide of LCS6. The double arrow points to the homozygous T allele.

| <b>Patient</b> | <b>Sex</b> | <b>Population</b> | <b>Age</b> | <b>Pack-Year</b>     | <b>Cancer Type</b>               | <b>LCS6 Variant</b> |
|----------------|------------|-------------------|------------|----------------------|----------------------------------|---------------------|
| 1              | F          | Caucasian         | 64         | 150                  | Adenocarcinoma                   | N                   |
| 2              | M          | Caucasian         | 73         | 20                   | Adenosquamous                    | N                   |
| 3              | M          | Caucasian         | 64         | 50                   | Large cell                       | N                   |
| 4              | F          | Caucasian         | 76         | unknown              | Adenocarcinoma                   | N                   |
| 5              | M          | Hispanic          | 54         | 70                   | Squamous cell                    | N                   |
| 6              | M          | Caucasian         | 64         | 10                   | Squamous cell                    | Y                   |
| 7              | M          | Caucasian         | 86         | 60                   | Squamous cell                    | N                   |
| 8              | F          | Caucasian         | 54         | 0                    | Adenocarcinoma                   | N                   |
| 9              | F          | Caucasian         | 58         | 40                   | Adenosquamous                    | N                   |
| 10             | F          | Caucasian         | 65         | 150                  | Adenocarcinoma                   | N                   |
| 11             | M          | Caucasian         | 64         | 17                   | Adenocarcinoma                   | Y                   |
| 12             | F          | Hispanic          | 65         | 20                   | Adenocarcinoma                   | N                   |
| 13             | F          | Caucasian         | 89         | unknown              | Adenocarcinoma                   | N                   |
| 14             | F          | Caucasian         | 47         | 0                    | Large cell                       | N                   |
| 15             | M          | Caucasian         | 48         | 45                   | Squamous cell                    | Y                   |
| 16             | M          | Caucasian         | 85         | 70                   | Adenocarcinoma                   | N                   |
| 17             | M          | Caucasian         | 86         | 75                   | Adenosquamous                    | N                   |
| 18             | F          | Caucasian         | 49         | 15                   | Squamous cell,<br>Adenocarcinoma | Y                   |
| 19             | M          | Asian             | 55         | 40                   | Squamous cell                    | N                   |
| 20             | F          | Caucasian         | 74         | 0                    | Adenocarcinoma                   | N                   |
| 21             | F          | Caucasian         | 58         | 2                    | Adenocarcinoma                   | Y                   |
| 22             | F          | AA                | 40         | 20                   | Adenocarcinoma                   | N                   |
| 23             | F          | Caucasian         | 52         | 30                   | Adenocarcinoma,<br>BAC           | N                   |
| 24             | M          | Caucasian         | 50         | 40                   | Large cell                       | N                   |
| 25             | M          | Caucasian         | 69         | 105                  | Adenocarcinoma                   | N                   |
| 26             | F          | Caucasian         | 75         | 50                   | Adenocarcinoma                   | N                   |
| 27             | M          | Caucasian         | 83         | 60                   | Large cell                       | N                   |
| 28             | M          | Caucasian         | 42         | 20                   | Adenocarcinoma                   | Y                   |
| 29             | F          | Caucasian         | 52         | 35 years             | Adenocarcinoma                   | N                   |
| 30             | M          | Caucasian         | 71         | 70                   | Adenocarcinoma,<br>Squamous cell | N                   |
| 31             | F          | AA                | 69         | 50                   | Adenocarcinoma                   | N                   |
| 32             | M          | Caucasian         | 44         | 50                   | Adenocarcinoma                   | N                   |
| 33             | F          | Caucasian         | 66         | 2 <sup>nd</sup> hand | Adenocarcinoma                   | Y                   |
| 34             | F          | Caucasian         | 73         | 75                   | Adenocarcinoma                   | N                   |
| 35             | M          | AA                | 72         | 30                   | Adenocarcinoma                   | N                   |
| 36             | F          | Caucasian         | 72         | 120                  | Squamous cell                    | Y                   |
| 37             | F          | Caucasian         | 62         | 50                   | Adenocarcinoma                   | N                   |
| 38             | M          | Caucasian         | 74         | unknown              | Adenocarcinoma                   | N                   |
| 39             | M          | Caucasian         | 78         | 20                   | Adenocarcinoma                   | N                   |
| 40             | M          | Caucasian         | 68         | 32                   | Adenocarcinoma                   | N                   |
| 41             | M          | Caucasian         | 66         | 40                   | Adenosquamous                    | N                   |
| 42             | M          | Caucasian         | 88         | 40                   | Squamous cell                    | Y                   |
| 43             | F          | Caucasian         | 63         | 60                   | Adenocarcinoma                   | N                   |
| 44             | F          | AA                | 69         | 0                    | Adenocarcinoma                   | N                   |

|    |   |           |    |                      |                                  |   |
|----|---|-----------|----|----------------------|----------------------------------|---|
| 45 | M | Caucasian | 60 | 17                   | Squamous cell                    | Y |
| 46 | F | AA        | 49 | 50                   | Adenocarcinoma                   | N |
| 47 | F | Caucasian | 65 | 60                   | Adenosquamous                    | N |
| 48 | M | Caucasian | 63 | 45                   | Adenocarcinoma                   | N |
| 49 | F | Asian     | 67 | 0                    | Adenocarcinoma                   | N |
| 50 | M | Caucasian | 60 | 100                  | Adenocarcinoma                   | Y |
| 51 | M | Caucasian | 65 | 125                  | Carcinoma                        | N |
| 52 | M | Caucasian | 52 | 80                   | Squamous cell                    | N |
| 53 | M | Caucasian | 62 | 90                   | Squamous cell                    | N |
| 54 | F | Caucasian | 69 | 140                  | Large cell                       | N |
| 55 | F | Caucasian | 61 | 40                   | Squamous cell                    | N |
| 56 | F | Caucasian | 80 | 15                   | Squamous cell                    | N |
| 57 | M | Caucasian | 73 | 60                   | Squamous cell                    | Y |
| 58 | F | Caucasian | 57 | 120                  | Adenocarcinoma                   | N |
| 59 | F | Caucasian | 56 | 15                   | Adenocarcinoma                   | N |
| 60 | M | Caucasian | 43 | 40                   | Adenocarcinoma                   | Y |
| 61 | F | Asian     | 47 | 10                   | Adenocarcinoma                   | N |
| 62 | F | Caucasian | 39 | 2 <sup>nd</sup> hand | BAC                              | N |
| 63 | M | Caucasian | 76 | 55                   | Adenocarcinoma                   | N |
| 64 | F | Caucasian | 43 | 33                   | Adenocarcinoma                   | Y |
| 65 | F | Caucasian | 50 | 30                   | Squamous cell                    | N |
| 66 | M | Caucasian | 70 | 100                  | Squamous cell,<br>Adenocarcinoma | N |
| 67 | M | Caucasian | 70 | 56                   | Squamous cell                    | N |
| 68 | F | Caucasian | 73 | 94                   | Adenocarcinoma                   | N |
| 69 | F | AA        | 62 | 40                   | Adenocarcinoma                   | N |
| 70 | M | Caucasian | 58 | 80                   | Adenocarcinoma                   | N |
| 71 | M | Caucasian | 71 | 55                   | Adenocarcinoma                   | N |

**Supplementary Table 1: Yale NSCLC patient characteristics.**

Proportion male (M) (49.3%) and female (F) (50.7%), proportion Caucasian (84.5%), African American (AA)(8.6%), Hispanic (2.8%) and Asian (4.2%). For patients with multiple simultaneously diagnosed lung cancers both cancer types are listed. The presence or absence of the variant allele at the LCS6 SNP is denoted as Yes (Y) or No (N).

| <b>Variables</b>                           | <b>Controls</b> | <b>Cases</b> | <b>P-value</b>       |
|--------------------------------------------|-----------------|--------------|----------------------|
| N                                          | 325             | 218          |                      |
| Age                                        | 64.8 ± 9.0      | 65.1 ± 9.0   | 0.72 <sup>a</sup>    |
| Sex (male, %)                              | 68.9            | 73.9         | 0.22 <sup>b</sup>    |
| Ethnicity (%)                              |                 |              | 0.01 <sup>b</sup>    |
| White                                      | 67.4            | 75.7         |                      |
| Hispanic                                   | 24.9            | 14.7         |                      |
| Others                                     | 7.7             | 9.6          |                      |
| Current smoking status (current smoker, %) | 32.9            | 37.2         | 0.31 <sup>b</sup>    |
| Pack-years                                 | 41.4 ± 28.5     | 56.9 ± 32.4  | <0.0001 <sup>c</sup> |
| Family history of cancer (yes, %)          | 44.6            | 59.4         | 0.0008 <sup>b</sup>  |
| Histology (%)                              |                 |              |                      |
| Adenocarcinoma                             |                 | 45.9         |                      |
| Squamous cell carcinoma                    |                 | 24.8         |                      |
| Others <sup>d</sup>                        |                 | 29.4         |                      |

**Supplementary Table 2A. Demographic New Mexico Lung Cancer Case-Control**

**Data.** Cases indicate patients with lung cancer and controls are non-cancerous patients.

<sup>a</sup>Two-sided two-sample *t*-test between cases and controls. <sup>b</sup> $\chi^2$  test for differences between cases and controls. <sup>c</sup>Two-sided Wilcoxon rank sum test between cases and controls.

<sup>d</sup>Others included large cell lung cancer, poorly differentiated and other non-small cell lung cancer.

**Supplementary Table 2B. Demographic characteristics among Boston NSCLC cases and controls**

| Characteristics                           | Overall           |                      |       | Male              |                     |       | Female            |                     |              |
|-------------------------------------------|-------------------|----------------------|-------|-------------------|---------------------|-------|-------------------|---------------------|--------------|
|                                           | Cases<br>(n=2205) | Controls<br>(n=1497) | p     | Cases<br>(n=1118) | Controls<br>(n=665) | p     | Cases<br>(n=1087) | Controls<br>(n=832) | p            |
| Age (mean±SD)                             | 64.9±10.7         | 58.2±12.1            | <0.01 | 65.8±10.5         | 60.2±12.8           | <0.01 | 64.8±11.0         | 56.8±11.4           | <0.01        |
| Gender, N (%)                             |                   |                      |       |                   |                     |       |                   |                     |              |
| Female                                    | 1087 (49.3%)      | 822 (55.6%)          | <0.01 |                   |                     |       |                   |                     |              |
| Male                                      | 1118 (50.7%)      | 665 (44.4%)          |       |                   |                     |       |                   |                     |              |
| Smoking, N (%)                            |                   |                      |       |                   |                     |       |                   |                     |              |
| Never                                     | 204 (9.3%)        | 522 (34.9%)          | <0.01 | 77 (6.8%)         | 206 (30.8%)         | <0.01 | 128 (11.7%)       | 324 (38.6%)         | <0.01        |
| Ex-smoker                                 | 1174 (53.2%)      | 688 (46.9%)          |       | 649 (57.6%)       | 362 (53.8%)         |       | 535 (48.8%)       | 333 (39.7%)         |              |
| Current smoker                            | 827 (37.5%)       | 287 (19.2%)          |       | 401 (35.6%)       | 105 (15.6%)         |       | 434 (39.6%)       | 183 (21.8%)         |              |
| Years since quit (median) <sup>a, b</sup> | 12 (1-59)         | 18 (1-65)            | <0.01 | 14 (1-59)         | 20 (1-65)           | <0.01 | 12 (1-55)         | 17 (1-59)           | <0.01        |
| Pack-years <sup>b</sup>                   | 50 (0.1-231)      | 25 (0.1-218)         |       | <0.01             | 58 (0.2-231)        |       | 29 (0.1-210)      | <0.01               |              |
| Tumor stage (%)                           |                   |                      |       |                   |                     |       |                   |                     |              |
| I and II                                  | 48.6%             |                      |       | 49.0%             |                     |       | 48.0%             |                     |              |
| III and IV                                | 51.3%             |                      |       | 51.0%             |                     |       | 52.0%             |                     |              |
| Cell type (%)                             |                   |                      |       |                   |                     |       |                   |                     |              |
| Adenocarcinoma                            | 57.0%             |                      |       | 50.6%             |                     |       | 63.4%             |                     |              |
| Squamous cell carcinoma                   | 21.9%             |                      |       | 28.1%             |                     |       | 15.6%             |                     |              |
| Others                                    | 21.1%             |                      |       | 21.3%             |                     |       | 21.0%             |                     |              |
| Kraslet7 genotypes                        |                   |                      |       |                   |                     |       |                   |                     |              |
| <i>TT</i>                                 | 1805 (81.9%)      | 1248 (83.4%)         | 0.32  | 944 (84.4%)       | 549 (82.6%)         | 0.46  | 861 (79.2%)       | 699 (84.0%)         | <b>0.02</b>  |
| <i>TG</i>                                 | 378 (17.4%)       | 231 (15.4%)          |       | 161 (14.4%)       | 105 (15.8%)         |       | 217 (20.0%)       | 126 (15.1%)         |              |
| <i>GG</i>                                 | 22 (1.0%)         | 18 (1.2%)            |       | 13 (1.2%)         | 11 (1.7%)           |       | 9 (0.8%)          | 7 (0.8%)            |              |
| <i>TG+GG</i>                              | 400 (18.1%)       | 249 (16.6)           | 0.25* | 174 (15.6%)       | 116 (17.4%)         | 0.32* | 226 (20.6%)       | 133 (15.8%)*        | <b>0.008</b> |

<sup>a</sup>Ex-smokers only; <sup>b</sup>Median (range), tested by non-parametric Wilcoxon's rank sum test; <sup>c</sup>Continuous variables tested with the Student's *t*-test; categorical variables tested using the  $\chi^2$  test.

\* Compared with *TT* genotype, Fisher's exact test.

**Supplementary Table 3. Primer Sequences Used**

|                                                  | <b>Primer</b> | <b>Sequence (5'-3')</b>                   |
|--------------------------------------------------|---------------|-------------------------------------------|
| For sequencing the <i>KRAS</i> 3'UTR             | SMJ104        | CTAGCTAGCATACAATTTGTA CTTTTTTCTTAAGGCATAC |
|                                                  | LJC1          | GGCACACCACCACCCCAAATCTC                   |
|                                                  | LJC2          | CCATCTTCAGTGCCAGTCTTGGG                   |
|                                                  | LJC3          | GGGTCGTATACCAAAGGCCTTAG                   |
|                                                  | LJC4          | GCCTGAACTAGTTCACAGACAAGGG                 |
|                                                  | LJC5          | CTAGCTAGCTCAATGCAGAATTCATGCTATCCAG        |
| For sequencing only<br>LCS6 and RFLP<br>analysis | LJC21         | GGTGT CAGAGTCTCGCTCTT                     |
|                                                  | LJC3          | GGGTCGTATACCAAAGGCCTTAG                   |
|                                                  | LJC27*        | CCTGAGTAGCTGGGATTACA                      |
|                                                  | LJC28*        | GGATACCATATACCCAGTGCCTT                   |
| For sequencing the <i>NRAS</i> 3'UTR             | LJC13         | CCACTTTCAAGCTGCACTGACAC                   |
|                                                  | LJC8          | CTAGCTGGAGTTACTGGTGCAATGAGC               |
|                                                  | LJC9          | GATACCTATGAGGATTTGGAGGC                   |
|                                                  | LJC10         | GCATGGTAGCCTTCAGACAGAAC                   |
|                                                  | LJC11         | CTGCTTCTTGTAATTCATCTCTGC                  |
|                                                  | LJC12         | CAACTTAAAATATCGGCCCTTCC                   |
| For making<br>KRAS<br>wild-type                  | SMJ104        | CTAGCTAGCATACAATTTGTA CTTTTTTCTTAAGGCATAC |
|                                                  | LJC5          | CTAGCTAGCTCAATGCAGAATTCATGCTATCCAG        |
| For<br>making<br>KRAS<br>mLCS6                   | LJC16         | CGAACTCCTGACCTCAAGTGATgCACCCACCTT         |
|                                                  | LJC17         | ATCACTTGAGGTCAGGAGTTCGAGACCAGCCT          |

\* = used for nested PCR

|             |                       | Primary Lung<br>Tumor/Adjacent<br>Non-tumor<br>Tissue | Primary<br>Lung<br>Tumor | Non-primary<br>Lung Tumor with<br>or without<br>Adjacent Non-<br>tumor Tissue | Non-cancerous<br>Lung |
|-------------|-----------------------|-------------------------------------------------------|--------------------------|-------------------------------------------------------------------------------|-----------------------|
| <b>LCS1</b> | 4th bp = A            | 35                                                    | 16                       | 5                                                                             | 3                     |
|             | 4th bp = A/C          | 6 <sup>†</sup>                                        | 1                        | 1 <sup>!</sup>                                                                | 0                     |
|             | 25th bp = G           | 14                                                    | 5                        | 2                                                                             | 3                     |
|             | rs712(-) = T/G        | 27 <sup>§</sup>                                       | 12                       | 4                                                                             | 0                     |
|             | <b>Total Patients</b> | 41                                                    | 17                       | 6                                                                             | 3                     |
| <b>LCS9</b> | 20th bp = T           | 37                                                    | 15                       | 6                                                                             | 1                     |
|             | 20th bp = T/C         | 3 <sup>‡</sup>                                        | 2                        | 0                                                                             | 2                     |
|             | 15th bp = C           | 39                                                    | 17                       | 6                                                                             | 3                     |
|             | 15th bp = C/T         | 1 <sup>!</sup>                                        | 0                        | 0                                                                             | 0                     |
|             | <b>Total Patients</b> | 40                                                    | 17                       | 6                                                                             | 3                     |
| <b>LCS4</b> | 14th bp = C           | 40                                                    | 18                       | 6                                                                             | 3                     |
|             | 14th bp = C/T         | 1 <sup>¶</sup>                                        | 0                        | 0                                                                             | 0                     |
|             | <b>Total Patients</b> | 41                                                    | 18                       | 6                                                                             | 3                     |

**Supplementary Table 4. Alterations in *KRAS* 3'UTR LCSs.** All LCSs in which mutations were identified in are listed here, as are the number of NSCLC patients with these mutations. 68% of the primary lung tumors and 67% of the non-primary lung tumors examined were heterozygous at the rs712 locus in LCS1. A mutation at the fourth nucleotide of LCS1 was found in patients of both sexes and in a variety of non-small cell lung cancers types. The change at the twentieth nucleotide of LCS9 and was found in both sexes and in cancerous and non-cancerous lungs. The mutation at the twelfth base of LCS9 was seen in the adjacent tissue sample of a female, adenosquamous carcinoma patient. A mutation at the fifteenth base pair of LCS9 was found in the adjacent tissue of a female, squamous cell carcinoma patient, where as the primary lung tumor sample was normal. Lastly, there was one case of a mutation in LCS4. Both the tumor and adjacent tissue samples were heterozygous at this site. <sup>†</sup>Only tumor sample (3 patients), only adjacent sample (3 patients). <sup>§</sup>Tumor and adjacent samples (24 patients), only tumor sample (1 patient), only adjacent sample (2 patients). <sup>‡</sup>Only tumor sample (2 patients), tumor and adjacent samples (1 patient). <sup>!</sup> Only adjacent sample. <sup>¶</sup>Tumor and adjacent samples.
